# Supplementary material for: Real-World Outcomes of Patients with Advanced Epidermal Growth Factor Receptor-Mutated Non-Small Cell Lung Cancer in Canada Using Data Extracted by Large Language Model-Based Artificial Intelligence
Source: MDPI journal article supplement (doi:10.3390/curroncol31040146), 2024-04-02
Supplement: s1 [file s1]

## Supplementary Material

**Table S1.** 1L treatments in advanced stage NSCLC patients stratified by mutation status at diagnosis

|                        | Common sensitizing<br><i>EGFR</i> (N=136) | Exon 20 insertion<br>(N=8) | <i>EGFR</i> WT<br>(N=338) |
|------------------------|-------------------------------------------|----------------------------|---------------------------|
| <b>Any Treatment</b>   | <b>129 (94.9%)</b>                        | <b>7 (87.5%)</b>           | <b>232 (68.6%)</b>        |
| <b><i>EGFR</i> TKI</b> | <b>124 (91.2%)</b>                        | <b>1 (12.5%)</b>           | <b>9 (2.7%)</b>           |
| Gefitinib              | 67 (49.3%)                                | 0                          | 3 (0.9%)                  |
| Osimertinib            | 45 (33.1%)                                | 0                          | 1 (0.3%)                  |
| Afatinib               | 10 (7.4%)                                 | 1 (12.5%)                  | 5 (1.5%)                  |
| Erlotinib              | 2 (1.5%)                                  | 0                          | 0                         |
| <b>ALK TKI</b>         | <b>0</b>                                  | <b>0</b>                   | <b>35 (10.4%)</b>         |
| Alectinib              | 0                                         | 0                          | 22 (6.5%)                 |
| Crizotinib             | 0                                         | 0                          | 13 (3.8%)                 |
| <b>Chemotherapy</b>    | <b>5 (3.7%)</b>                           | <b>2 (25.0%)</b>           | <b>127 (37.6%)</b>        |
| Etoposide              | 1 (0.7%)                                  | 0                          | 6 (1.8%)                  |
| Gemcitabine            | 0                                         | 0                          | 5 (1.5%)                  |
| Irinotecan             | 0                                         | 0                          | 1 (0.3%)                  |
| Platinum               | 5 (3.7%)                                  | 2 (25.0%)                  | 118 (34.9%)               |
| Docetaxel              | 0                                         | 0                          | 1 (0.3%)                  |
| Vinorelbine            | 1 (0.7%)                                  | 0                          | 2 (0.6%)                  |
| Paclitaxel             | 0                                         | 1 (12.5%)                  | 7 (2.1%)                  |
| Pemetrexed             | 3 (2.2%)                                  | 1 (12.5%)                  | 107 (31.7%)               |
| <b>Immunotherapy</b>   | <b>0</b>                                  | <b>1 (12.5%)</b>           | <b>100 (29.6%)</b>        |
| Durvalumab             | 0                                         | 0                          | 6 (1.8%)                  |
| Tremelimumab           | 0                                         | 0                          | 6 (1.8%)                  |
| Pembrolizumab          | 0                                         | 1 (12.5%)                  | 94 (27.8%)                |
| <b>Other</b>           | <b>2 (1.5%)</b>                           | <b>3 (37.5%)</b>           | <b>15 (4.4%)</b>          |
| Trastuzumab            | 0                                         | 0                          | 2 (0.6%)                  |
| Pertuzumab             | 0                                         | 0                          | 2 (0.6%)                  |
| Binimetinib            | 0                                         | 0                          | 6 (1.8%)                  |
| Capmatinib             | 1 (0.7%)                                  | 0                          | 0                         |
| Entrectinib            | 0                                         | 0                          | 2 (0.6%)                  |
| Mg1Maga3               | 0                                         | 0                          | 1 (0.3%)                  |
| Lenvatinib             | 0                                         | 0                          | 1 (0.3%)                  |
| Selpercatinib          | 0                                         | 0                          | 1 (0.3%)                  |
| Savolitinib            | 1 (0.7%)                                  | 0                          | 0                         |
| Poziotinib             | 0                                         | 3 (37.5%)                  | 0                         |
| Sotorasib              | 0                                         | 0                          | 2 (0.6%)                  |
| <b>No treatment</b>    | <b>7 (5.1%)</b>                           | <b>1 (12.5%)</b>           | <b>106 (31.4%)</b>        |

|                                                                                 | Common sensitizing<br><i>EGFR</i> (N=136) | Exon 20 insertion<br>(N=8) | <i>EGFR</i> WT<br>(N=338) |
|---------------------------------------------------------------------------------|-------------------------------------------|----------------------------|---------------------------|
| <b>Time from diagnosis to 1<sup>st</sup> line treatment initiation (months)</b> |                                           |                            |                           |
| Mean (SD)                                                                       | 1.840 (4.778)                             | 3.912 (4.520)              | 2.461 (4.493)             |
| Median (Range)                                                                  | 0.822 (0.000, 35.769)                     | 2.499 (0.000, 13.644)      | 1.512 (0.000, 44.054)     |
| Missing                                                                         | 7                                         | 1                          | 106                       |

Patients could have received multiple treatments in 1L and therefore percentages may not add up to 100%.  
ALK: Anaplastic lymphoma kinase; *EGFR*: *Epidermal growth factor receptor*; NSCLC: Non-small cell lung cancer; TKI: Tyrosine kinase inhibitor; WT: Wild-type.

**Table S2.** Evaluation of DARWEN<sup>TM</sup> AI

| Feature                                          | Possible values                                                        | Precision   | Recall      | F1          | Overall accuracy |
|--------------------------------------------------|------------------------------------------------------------------------|-------------|-------------|-------------|------------------|
| <b>Histology</b>                                 | Adenocarcinoma, Non-small cell, Large cell, Adenosquamous, Sarcomatoid | <b>0.98</b> | <b>0.94</b> | <b>0.96</b> | <b>0.96</b>      |
| <b>Smoking status</b>                            | Smoker, Former smoker, Never smoker                                    | <b>0.92</b> | <b>0.90</b> | <b>0.91</b> | <b>0.90</b>      |
| <b>Cigarette pack-years</b>                      | Numeric                                                                |             |             |             | <b>0.84</b>      |
| <b>ECOG at diagnosis</b>                         | 0–5                                                                    | <b>0.97</b> | <b>0.97</b> | <b>0.97</b> | <b>0.97</b>      |
| <b>Tumour stage at diagnosis</b>                 | I–IV                                                                   | <b>0.92</b> | <b>0.93</b> | <b>0.92</b> | <b>0.93</b>      |
| <b>Organ level metastatic sites at diagnosis</b> | Bone, Lung, Brain, Liver                                               | <b>0.96</b> | <b>0.96</b> | <b>0.96</b> | <b>0.99</b>      |
| <b>Biomarkers</b>                                | EGFR tested, EGFR positive, EGFR negative, EGFR indeterminate          | <b>0.92</b> | <b>0.85</b> | <b>0.88</b> | <b>0.90</b>      |

ECOG: Eastern Cooperative Oncology Group; EGFR: Epidermal growth factor receptor; MET: Mesenchymal epithelial transition factor receptor. Precision: positive predictive value; recall: sensitivity, and F1: harmonic mean of precision and recall.

**Figure S1.** Summary of included patients

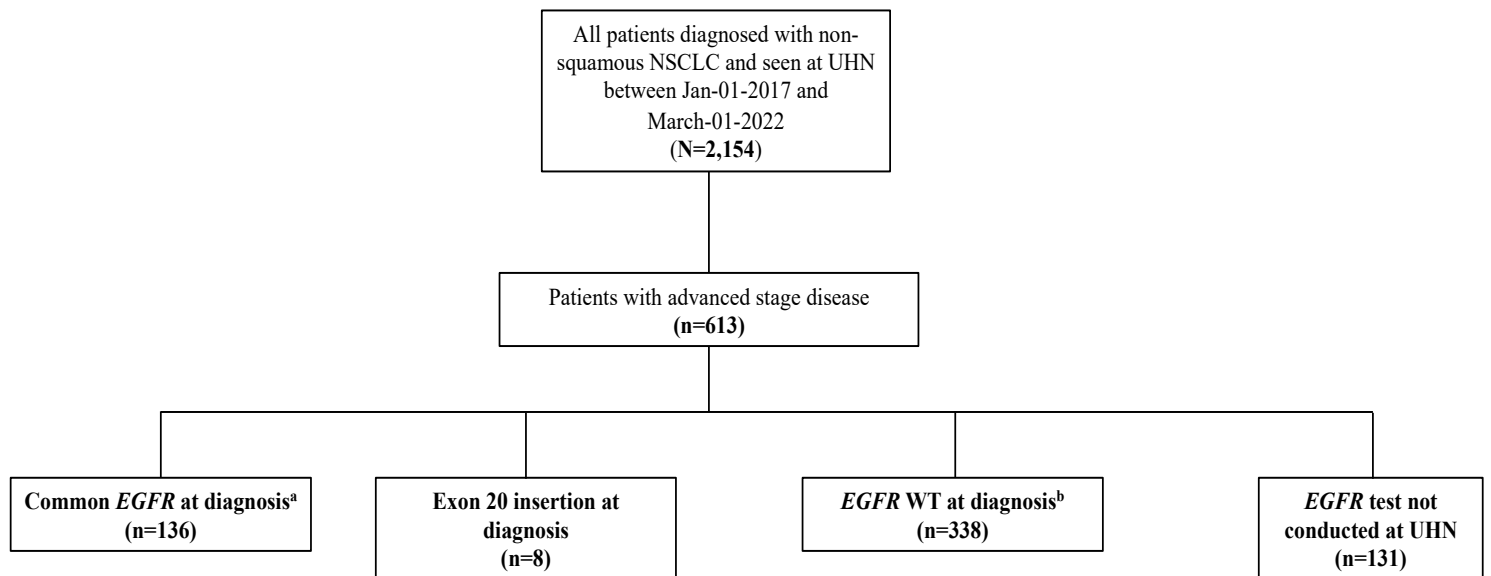

<sup>a</sup>Includes patients with exon 19 deletions or exon 21 L858R mutations; <sup>b</sup>Includes patients with a negative *EGFR* test within 3 months of NSCLC diagnosis but does not exclude the possibility of other mutations; *EGFR*: *Epidermal growth factor receptor*; NSCLC: Non-small cell lung cancer; UHN-PMCC: University Health Network Princess Margaret Cancer Centre; WT: Wild-type.
